# Supplementary material for: DNA Methylation and Gene Expression Profiling of Ewing Sarcoma Primary Tumors Reveal Genes That Are Potential Targets of Epigenetic Inactivation
Source: Sarcoma. 2012 Sep 12;2012:498472. doi: 10.1155/2012/498472 (PMC3447379; doi:10.1155/2012/498472)
Supplement: Supplementary file 7 [file 498472.f7.xlsx]

## Sheet: Sheet1
Supplemental Table S2: Raw Methylation Data after Statistical Analysis
Gene ID	Symbol	coef	rawp	FDR
EPHA3_P106_R	EPHA3	0.68843	1.7e-21	1.39e-18
MME_P388_F	MME	0.675647	1.3e-16	2.66e-14
NTRK2_P395_R	NTRK2	0.616525	6.29e-18	1.72e-15
ELK3_P514_F	ELK3	0.586845	2.03e-06	4.08e-05
SEPT5_P464_R	SEPT5	0.560659	1.35e-12	1.58e-10
CYP1B1_E83_R	CYP1B1	0.535141	1.64e-10	1.35e-08
TFAP2C_E260_F	TFAP2C	0.530009	9.93e-13	1.36e-10
SMARCB1_P220_R	SMARCB1	0.526701	3.28e-09	1.68e-07
NGFR_P355_F	NGFR	0.503711	6e-12	5.69e-10
WNT5A_P655_F	WNT5A	0.472836	6.24e-12	5.69e-10
SEPT5_P441_F	SEPT5	0.467568	6.72e-06	0.000119755
RYK_P493_F	RYK	0.461707	2.33e-10	1.74e-08
CCNA1_E7_F	CCNA1	0.459413	0.00016514	0.00197657
RARRES1_P426_R	RARRES1	0.452981	2.88e-07	7.87e-06
HS3ST2_E145_R	HS3ST2	0.429307	2.26e-09	1.24e-07
RUNX3_P393_R	RUNX3	0.422047	3.58e-08	1.13e-06
MMP2_P303_R	MMP2	0.408098	0.000300066	0.00324461
DNAJC15_P65_F	DNAJC15	0.407132	5.68e-16	9.31e-14
SOX17_P287_R	SOX17	0.389096	0.000166321	0.00197657
COL1A1_P5_F	COL1A1	0.387736	1.8e-08	6.69e-07
SERPINE1_E189_R	SERPINE1	0.38661	6.52e-09	2.81e-07
HOXB13_E21_F	HOXB13	0.38317	2.11e-08	7.52e-07
UBA52_P293_R	UBA52	0.379718	0.000157646	0.00192939
TNK1_P221_F	TNK1	0.372942	2.43e-07	6.87e-06
MLH3_E72_F	MLH3	0.369551	3.91e-09	1.89e-07
DNMT1_P100_R	DNMT1	0.360196	5.63e-09	2.56e-07
MLF1_E243_F	MLF1	0.35925	1.29e-09	7.58e-08
AXL_P223_R	AXL	0.354163	0.00030072	0.00324461
RUNX3_P247_F	RUNX3	0.351484	0.000332352	0.00344673
HOXA9_P303_F	HOXA9	0.342257	5.95e-05	0.000800364
DDB2_P613_R	DDB2	0.339362	8.04e-07	2e-05
HIF1A_P488_F	HIF1A	0.335085	1.91e-05	0.000279845
ESR1_P151_R	ESR1	0.330969	0.000321522	0.00338011
HHIP_P578_R	HHIP	0.330496	9.78e-07	2.36e-05
CD9_P504_F	CD9	0.329201	2.09e-06	4.08e-05
E2F5_P516_R	E2F5	0.328872	3.4e-10	2.33e-08
LYN_P241_F	LYN	0.327435	0.00065064	0.00573683
TJP2_P518_F	TJP2	0.321483	3.03e-08	9.92e-07
TFRC_P414_R	TFRC	0.321426	7.97e-06	0.000133379
ZMYND10_P329_F	ZMYND10	0.318718	1.89e-06	3.98e-05
EPHB1_P503_F	EPHB1	0.312478	2.08e-06	4.08e-05
PTGS2_P524_R	PTGS2	0.309793	5.61e-08	1.7e-06
SOX2_P546_F	SOX2	0.302627	0.00617832	0.0320647
PDE1B_P263_R	PDE1B	0.294947	1.28e-06	2.85e-05
MMP14_P13_F	MMP14	0.293115	8.2e-06	0.000134439
DNAJC15_E26_R	DNAJC15	0.292488	0.000601048	0.00541604
ERG_E28_F	ERG	0.286101	0.000496782	0.00468232
BCR_P346_F	BCR	0.285702	0.00343413	0.0209335
ACVR1C_P363_F	ACVR1C	0.284498	0.000669375	0.00583923
ITGA6_P298_R	ITGA6	0.276804	7.58e-07	1.94e-05
SNCG_P53_F	SNCG	0.268951	0.00216088	0.0144059
CHFR_P501_F	CHFR	0.266286	0.000559076	0.00519055
CSPG2_P82_R	CSPG2	0.265317	4.08e-05	0.000558136
TCF7L2_P193_R	TCF7L2	0.261671	9.19e-09	3.59e-07
TGFBI_P173_F	TGFBI	0.256805	0.0041793	0.0239652
EPHB3_E0_F	EPHB3	0.2548	1.52e-05	0.000239017
SEPT9_P58_R	SEPT9	0.253341	0.00123008	0.00942676
NTRK3_P636_R	NTRK3	0.253064	1.51e-05	0.000239017
DCC_P471_R	DCC	0.252804	1.12e-06	2.62e-05
DIO3_E230_R	DIO3	0.252352	0.00034047	0.00344673
MT1A_E13_R	MT1A	0.24888	0.000586214	0.00534106
HTR1B_E232_R	HTR1B	0.245849	0.00339444	0.0209281
CD44_P87_F	CD44	0.244025	0.00998536	0.0465227
CALCA_P75_F	CALCA	0.244023	0.0103325	0.0473649
EYA4_E277_F	EYA4	0.242635	0.00158508	0.0117779
FGF2_P153_F	FGF2	0.238825	0.00931558	0.0441548
IGF2AS_P203_F	IGF2AS	0.2386	0.000363541	0.00354885
NRAS_P103_R	NRAS	0.236994	0.000113406	0.00145302
TESK2_P252_R	TESK2	0.235896	7.12e-08	2.09e-06
CCND3_P435_F	CCND3	0.231674	8.36e-05	0.00110594
MAP3K1_E81_F	MAP3K1	0.231121	0.000485919	0.00463318
FANCG_E207_R	FANCG	0.228714	0.00020682	0.00235545
EGFR_P260_R	EGFR	0.228101	7.78e-06	0.000132934
CDK10_E74_F	CDK10	0.227769	2.49e-08	8.51e-07
CTSL_P264_R	CTSL	0.224238	2.16e-05	0.000310894
GNMT_P197_F	GNMT	0.217502	0.00636381	0.0326145
CALCA_P171_F	CALCA	0.216776	0.00360018	0.0213924
MME_E29_F	MME	0.213783	0.00030686	0.00326786
IFNGR2_P377_R	IFNGR2	0.21361	0.00317953	0.0197516
PRSS8_E134_R	PRSS8	0.212071	2.61e-18	1.07e-15
NQO1_E74_R	NQO1	0.205182	3e-05	0.000424704
MMP2_P197_F	MMP2	0.203134	0.000123683	0.00156031
BCR_P422_F	BCR	0.198888	0.00347189	0.0209335
COL1A2_E299_F	COL1A2	0.196622	0.00490015	0.0276524
AATK_P519_R	AATK	0.192867	0.00370411	0.0218516
PTPRG_E40_R	PTPRG	0.189625	0.000359738	0.00354885
RHOC_P536_F	RHOC	0.188908	0.000346205	0.00346205
YES1_P600_F	YES1	0.187407	4.04e-07	1.07e-05
TMEFF1_P234_F	TMEFF1	0.187023	0.000614734	0.00547916
ITGA2_P26_R	ITGA2	0.186102	0.000339782	0.00344673
IRF5_E101_F	IRF5	0.185449	0.0070898	0.0352341
RBP1_E158_F	RBP1	0.179022	1.86e-06	3.98e-05
CDKN2B_E220_F	CDKN2B	0.177223	0.00682924	0.0343557
MYOD1_P50_F	MYOD1	0.173561	0.00576075	0.0304762
PRKCDBP_P352_R	PRKCDBP	0.173298	0.010244	0.0473649
TWIST1_P44_R	TWIST1	0.159188	0.000770081	0.00657777
BCL6_P248_R	BCL6	0.158769	0.0106011	0.0482939
EPS8_P437_F	EPS8	0.157617	0.0107934	0.0486226
PSIP1_P163_R	PSIP1	0.149086	1.74e-05	0.00026379
EGR4_P479_F	EGR4	0.146336	0.00197522	0.0134973
CAV1_P130_R	CAV1	0.142018	0.0103394	0.0473649
TNC_P57_F	TNC	0.141913	8.79e-05	0.00114422
THBS1_P500_F	THBS1	0.135074	0.00238314	0.0154879
FZD9_P175_F	FZD9	0.13468	0.000199711	0.00230652
PTGS1_P2_F	PTGS1	0.13344	0.000867818	0.00712508
MDS1_E45_F	MDS1	0.133194	0.00194974	0.0134973
DAPK1_P10_F	DAPK1	0.133168	0.000177172	0.00207544
TSG101_P257_R	TSG101	0.125667	0.011131	0.0488095
ROR1_P6_F	ROR1	0.12324	0.00608591	0.0317863
APC_P14_F	APC	0.118446	0.00628601	0.0324184
PTCH2_E173_F	PTCH2	0.114641	0.0109697	0.0486226
APBA1_P644_F	APBA1	0.112771	0.00212442	0.0142789
EPHA7_P205_R	EPHA7	0.112101	0.00818761	0.0402026
ARNT_P238_R	ARNT	0.110826	0.00121773	0.00942022
CDK6_E256_F	CDK6	0.106527	0.00200828	0.0136099
ID1_P659_R	ID1	0.10494	0.00853024	0.0416357
TERT_P360_R	TERT	0.103968	0.00549014	0.0294243
GABRB3_E42_F	GABRB3	0.0989912	0.011383	0.0496491
THY1_P149_R	THY1	0.0933819	0.00966637	0.0452939
IGFBP5_E144_F	IGFBP5	0.0918221	0.00495721	0.0276524
TWIST1_P355_R	TWIST1	0.0910178	0.00164557	0.0119373
FHIT_E19_R	FHIT	0.0818717	0.000928664	0.00734657
CCNE1_P683_F	CCNE1	0.0818215	0.00440835	0.0251031
C20orf47_P225_R	C20orf47	0.0780039	0.00692528	0.0346264
SMO_P455_R	SMO	0.0777032	0.0031372	0.0196374
YES1_P216_F	YES1	0.0760731	0.0110475	0.0487041
BMP6_P398_F	BMP6	0.073784	0.00380178	0.0221096
DST_E31_F	DST	0.0724851	0.00164053	0.0119373
RAF1_P330_F	RAF1	0.0724129	0.00545688	0.0294243
APP_P179_R	APP	0.0716689	0.00525953	0.0289451
MLLT3_E93_R	MLLT3	0.0689938	0.00238597	0.0154879
SLIT2_P208_F	SLIT2	0.0657609	0.00120938	0.00942022
TGFA_P558_F	TGFA	0.0617091	0.00165957	0.0119373
FYN_P352_R	FYN	0.061405	0.00224542	0.0148488
HLF_E192_F	HLF	0.0559707	0.0018511	0.0130854
RARB_E114_F	RARB	0.0485039	0.000267777	0.00296725
PTK2B_P673_R	PTK2B	0.0423734	0.00890795	0.0427165
CCKBR_P361_R	CCKBR	0.0403388	0.00196297	0.0134973
CASP6_P201_F	CASP6	-0.0405637	0.0095437	0.044976
CDKN1A_E101_F	CDKN1A	-0.0431119	0.00860998	0.0417762
PKD2_P336_R	PKD2	-0.0461655	0.00771854	0.0381277
ISL1_P379_F	ISL1	-0.0537482	0.000256965	0.00288645
IGF2R_P396_R	IGF2R	-0.0571656	7.21e-06	0.000125713
DDR1_E23_R	DDR1	-0.0748974	0.000563365	0.00519055
CTSH_P238_F	CTSH	-0.0768106	0.00093176	0.00734657
GNAS_P86_F	GNAS	-0.0783382	0.00346215	0.0209335
PLAGL1_P236_R	PLAGL1	-0.0847387	0.0109339	0.0486226
SEMA3F_P692_R	SEMA3F	-0.0867512	5.73e-06	0.000109175
TDG_E129_F	TDG	-0.0912994	0.00604483	0.0317741
SLC22A3_P634_F	SLC22A3	-0.0920179	0.004956	0.0276524
FLI1_E29_F	FLI1	-0.0932143	0.00665601	0.0336909
USP29_P205_R	USP29	-0.0967718	0.00525807	0.0289451
DUSP4_E61_F	DUSP4	-0.100808	0.00414938	0.0239612
FLT4_E206_F	FLT4	-0.102696	0.000792277	0.0066976
SPARC_E50_R	SPARC	-0.105287	0.00015078	0.00187333
BMPR1A_E88_F	BMPR1A	-0.10865	0.008714	0.0420323
HOXC6_P456_R	HOXC6	-0.118024	6.08e-06	0.000113137
CDH11_P354_R	CDH11	-0.120314	0.00533563	0.0291681
BCL3_E71_F	BCL3	-0.133528	0.00190377	0.0133427
TRAF4_P372_F	TRAF4	-0.139868	1.56e-05	0.000240616
ZIM2_E110_F	ZIM2	-0.143268	0.00267857	0.0171596
SNURF_P2_R	SNURF	-0.148181	0.0030163	0.0190259
MT1A_P600_F	MT1A	-0.149093	0.0109258	0.0486226
SNRPN_seq_12_S127_F	SNRPN	-0.150422	0.00375997	0.0220227
ABL2_P459_R	ABL2	-0.151784	0.00650003	0.0331057
MAPK14_P327_R	MAPK14	-0.15225	0.0108824	0.0486226
KRAS_E82_F	KRAS	-0.154947	0.000385873	0.00372254
SNURF_P78_F	SNURF	-0.160866	0.00139259	0.0105734
NFKB1_P336_R	NFKB1	-0.170957	0.0027889	0.0177279
DAPK1_E46_R	DAPK1	-0.177821	6.21e-06	0.000113137
ZIM2_P22_F	ZIM2	-0.180972	0.00239874	0.0154879
PTK6_E50_F	PTK6	-0.182137	0.00918492	0.0437886
BAX_E281_R	BAX	-0.188012	0.000898473	0.00729453
PTCH2_P568_R	PTCH2	-0.190561	0.00159432	0.0117779
TRIM29_E189_F	TRIM29	-0.192143	0.0115203	0.0499821
CRIP1_P274_F	CRIP1	-0.195067	0.001836	0.0130854
SLIT2_E111_R	SLIT2	-0.210219	1.79e-05	0.000266407
ESR1_E298_R	ESR1	-0.210375	0.000923064	0.00734657
ZNF215_P129_R	ZNF215	-0.223313	0.00151989	0.0114341
ATP10A_P524_R	ATP10A	-0.24087	0.00352384	0.0210916
HDAC1_P414_R	HDAC1	-0.264643	0.000868912	0.00712508
TNFRSF10C_P7_F	TNFRSF10C	-0.288876	0.00558115	0.0297178
MYLK_P469_R	MYLK	-0.294169	1.25e-06	2.85e-05
RBP1_P426_R	RBP1	-0.311083	0.00076633	0.00657777
RHOH_P121_F	RHOH	-0.323291	0.00538933	0.0292666
HOXA11_E35_F	HOXA11	-0.362008	3.95e-05	0.000548916
VAV1_E9_F	VAV1	-0.380559	0.000830764	0.00695129
MAP3K1_P7_F	MAP3K1	-0.466116	5.39e-10	3.4e-08
MATK_P190_R	MATK	-0.505612	8.24e-09	3.38e-07

## Sheet: Sheet2
Gene ID	Symbol	coef	rawp	FDR		Symbol
EPHA3_P106_R	EPHA3	0.68843	1.7e-21	1.39e-18		SEPT5
MME_P388_F	MME	0.675647	1.3e-16	2.66e-14		SEPT5
NTRK2_P395_R	NTRK2	0.616525	6.29e-18	1.72e-15		SEPT9
ELK3_P514_F	ELK3	0.586845	2.03e-06	4.08e-05		AATK
SEPT5_P464_R	2011-09-05	0.560659	1.35e-12	1.58e-10		ACVR1C
CYP1B1_E83_R	CYP1B1	0.535141	1.64e-10	1.35e-08		APBA1
TFAP2C_E260_F	TFAP2C	0.530009	9.93e-13	1.36e-10		APC
SMARCB1_P220_R	SMARCB1	0.526701	3.28e-09	1.68e-07		APP
NGFR_P355_F	NGFR	0.503711	6e-12	5.69e-10		ARNT
WNT5A_P655_F	WNT5A	0.472836	6.24e-12	5.69e-10		AXL
SEPT5_P441_F	2011-09-05	0.467568	6.72e-06	0.000119755		BCL6
RYK_P493_F	RYK	0.461707	2.33e-10	1.74e-08		BCR
CCNA1_E7_F	CCNA1	0.459413	0.00016514	0.00197657		BCR
RARRES1_P426_R	RARRES1	0.452981	2.88e-07	7.87e-06		BMP6
HS3ST2_E145_R	HS3ST2	0.429307	2.26e-09	1.24e-07		C20orf47
RUNX3_P393_R	RUNX3	0.422047	3.58e-08	1.13e-06		CALCA
MMP2_P303_R	MMP2	0.408098	0.000300066	0.00324461		CALCA
DNAJC15_P65_F	DNAJC15	0.407132	5.68e-16	9.31e-14		CAV1
SOX17_P287_R	SOX17	0.389096	0.000166321	0.00197657		CCKBR
COL1A1_P5_F	COL1A1	0.387736	1.8e-08	6.69e-07		CCNA1
SERPINE1_E189_R	SERPINE1	0.38661	6.52e-09	2.81e-07		CCND3
HOXB13_E21_F	HOXB13	0.38317	2.11e-08	7.52e-07		CCNE1
UBA52_P293_R	UBA52	0.379718	0.000157646	0.00192939		CD44
TNK1_P221_F	TNK1	0.372942	2.43e-07	6.87e-06		CD9
MLH3_E72_F	MLH3	0.369551	3.91e-09	1.89e-07		CDK10
DNMT1_P100_R	DNMT1	0.360196	5.63e-09	2.56e-07		CDK6
MLF1_E243_F	MLF1	0.35925	1.29e-09	7.58e-08		CDKN2B
AXL_P223_R	AXL	0.354163	0.00030072	0.00324461		CHFR
RUNX3_P247_F	RUNX3	0.351484	0.000332352	0.00344673		COL1A1
HOXA9_P303_F	HOXA9	0.342257	5.95e-05	0.000800364		COL1A2
DDB2_P613_R	DDB2	0.339362	8.04e-07	2e-05		CSPG2
HIF1A_P488_F	HIF1A	0.335085	1.91e-05	0.000279845		CTSL
ESR1_P151_R	ESR1	0.330969	0.000321522	0.00338011		CYP1B1
HHIP_P578_R	HHIP	0.330496	9.78e-07	2.36e-05		DAPK1
CD9_P504_F	CD9	0.329201	2.09e-06	4.08e-05		DCC
E2F5_P516_R	E2F5	0.328872	3.4e-10	2.33e-08		DDB2
LYN_P241_F	LYN	0.327435	0.00065064	0.00573683		DIO3
TJP2_P518_F	TJP2	0.321483	3.03e-08	9.92e-07		DNAJC15
TFRC_P414_R	TFRC	0.321426	7.97e-06	0.000133379		DNAJC15
ZMYND10_P329_F	ZMYND10	0.318718	1.89e-06	3.98e-05		DNMT1
EPHB1_P503_F	EPHB1	0.312478	2.08e-06	4.08e-05		DST
PTGS2_P524_R	PTGS2	0.309793	5.61e-08	1.7e-06		E2F5
SOX2_P546_F	SOX2	0.302627	0.00617832	0.0320647		EGFR
PDE1B_P263_R	PDE1B	0.294947	1.28e-06	2.85e-05		EGR4
MMP14_P13_F	MMP14	0.293115	8.2e-06	0.000134439		ELK3
DNAJC15_E26_R	DNAJC15	0.292488	0.000601048	0.00541604		EPHA3
ERG_E28_F	ERG	0.286101	0.000496782	0.00468232		EPHA7
BCR_P346_F	BCR	0.285702	0.00343413	0.0209335		EPHB1
ACVR1C_P363_F	ACVR1C	0.284498	0.000669375	0.00583923		EPHB3
ITGA6_P298_R	ITGA6	0.276804	7.58e-07	1.94e-05		EPS8
SNCG_P53_F	SNCG	0.268951	0.00216088	0.0144059		ERG
CHFR_P501_F	CHFR	0.266286	0.000559076	0.00519055		ESR1
CSPG2_P82_R	CSPG2	0.265317	4.08e-05	0.000558136		EYA4
TCF7L2_P193_R	TCF7L2	0.261671	9.19e-09	3.59e-07		FANCG
TGFBI_P173_F	TGFBI	0.256805	0.0041793	0.0239652		FGF2
EPHB3_E0_F	EPHB3	0.2548	1.52e-05	0.000239017		FHIT
SEPT9_P58_R	2011-09-09	0.253341	0.00123008	0.00942676		FYN
NTRK3_P636_R	NTRK3	0.253064	1.51e-05	0.000239017		FZD9
DCC_P471_R	DCC	0.252804	1.12e-06	2.62e-05		GABRB3
DIO3_E230_R	DIO3	0.252352	0.00034047	0.00344673		GNMT
MT1A_E13_R	MT1A	0.24888	0.000586214	0.00534106		HHIP
HTR1B_E232_R	HTR1B	0.245849	0.00339444	0.0209281		HIF1A
CD44_P87_F	CD44	0.244025	0.00998536	0.0465227		HLF
CALCA_P75_F	CALCA	0.244023	0.0103325	0.0473649		HOXA9
EYA4_E277_F	EYA4	0.242635	0.00158508	0.0117779		HOXB13
FGF2_P153_F	FGF2	0.238825	0.00931558	0.0441548		HS3ST2
IGF2AS_P203_F	IGF2AS	0.2386	0.000363541	0.00354885		HTR1B
NRAS_P103_R	NRAS	0.236994	0.000113406	0.00145302		ID1
TESK2_P252_R	TESK2	0.235896	7.12e-08	2.09e-06		IFNGR2
CCND3_P435_F	CCND3	0.231674	8.36e-05	0.00110594		IGF2AS
MAP3K1_E81_F	MAP3K1	0.231121	0.000485919	0.00463318		IGFBP5
FANCG_E207_R	FANCG	0.228714	0.00020682	0.00235545		IRF5
EGFR_P260_R	EGFR	0.228101	7.78e-06	0.000132934		ITGA2
CDK10_E74_F	CDK10	0.227769	2.49e-08	8.51e-07		ITGA6
CTSL_P264_R	CTSL	0.224238	2.16e-05	0.000310894		LYN
GNMT_P197_F	GNMT	0.217502	0.00636381	0.0326145		MAP3K1
CALCA_P171_F	CALCA	0.216776	0.00360018	0.0213924		MDS1
MME_E29_F	MME	0.213783	0.00030686	0.00326786		MLF1
IFNGR2_P377_R	IFNGR2	0.21361	0.00317953	0.0197516		MLH3
PRSS8_E134_R	PRSS8	0.212071	2.61e-18	1.07e-15		MLLT3
NQO1_E74_R	NQO1	0.205182	3e-05	0.000424704		MME
MMP2_P197_F	MMP2	0.203134	0.000123683	0.00156031		MME
BCR_P422_F	BCR	0.198888	0.00347189	0.0209335		MMP14
COL1A2_E299_F	COL1A2	0.196622	0.00490015	0.0276524		MMP2
AATK_P519_R	AATK	0.192867	0.00370411	0.0218516		MMP2
PTPRG_E40_R	PTPRG	0.189625	0.000359738	0.00354885		MT1A
RHOC_P536_F	RHOC	0.188908	0.000346205	0.00346205		MYOD1
YES1_P600_F	YES1	0.187407	4.04e-07	1.07e-05		NGFR
TMEFF1_P234_F	TMEFF1	0.187023	0.000614734	0.00547916		NQO1
ITGA2_P26_R	ITGA2	0.186102	0.000339782	0.00344673		NRAS
IRF5_E101_F	IRF5	0.185449	0.0070898	0.0352341		NTRK2
RBP1_E158_F	RBP1	0.179022	1.86e-06	3.98e-05		NTRK3
CDKN2B_E220_F	CDKN2B	0.177223	0.00682924	0.0343557		PDE1B
MYOD1_P50_F	MYOD1	0.173561	0.00576075	0.0304762		PRKCDBP
PRKCDBP_P352_R	PRKCDBP	0.173298	0.010244	0.0473649		PRSS8
TWIST1_P44_R	TWIST1	0.159188	0.000770081	0.00657777		PSIP1
BCL6_P248_R	BCL6	0.158769	0.0106011	0.0482939		PTCH2
EPS8_P437_F	EPS8	0.157617	0.0107934	0.0486226		PTGS1
PSIP1_P163_R	PSIP1	0.149086	1.74e-05	0.00026379		PTGS2
EGR4_P479_F	EGR4	0.146336	0.00197522	0.0134973		PTK2B
CAV1_P130_R	CAV1	0.142018	0.0103394	0.0473649		PTPRG
TNC_P57_F	TNC	0.141913	8.79e-05	0.00114422		RAF1
THBS1_P500_F	THBS1	0.135074	0.00238314	0.0154879		RARB
FZD9_P175_F	FZD9	0.13468	0.000199711	0.00230652		RARRES1
PTGS1_P2_F	PTGS1	0.13344	0.000867818	0.00712508		RBP1
MDS1_E45_F	MDS1	0.133194	0.00194974	0.0134973		RHOC
DAPK1_P10_F	DAPK1	0.133168	0.000177172	0.00207544		ROR1
TSG101_P257_R	TSG101	0.125667	0.011131	0.0488095		RUNX3
ROR1_P6_F	ROR1	0.12324	0.00608591	0.0317863		RUNX3
APC_P14_F	APC	0.118446	0.00628601	0.0324184		RYK
PTCH2_E173_F	PTCH2	0.114641	0.0109697	0.0486226		SERPINE1
APBA1_P644_F	APBA1	0.112771	0.00212442	0.0142789		SLIT2
EPHA7_P205_R	EPHA7	0.112101	0.00818761	0.0402026		SMARCB1
ARNT_P238_R	ARNT	0.110826	0.00121773	0.00942022		SMO
CDK6_E256_F	CDK6	0.106527	0.00200828	0.0136099		SNCG
ID1_P659_R	ID1	0.10494	0.00853024	0.0416357		SOX17
TERT_P360_R	TERT	0.103968	0.00549014	0.0294243		SOX2
GABRB3_E42_F	GABRB3	0.0989912	0.011383	0.0496491		TCF7L2
THY1_P149_R	THY1	0.0933819	0.00966637	0.0452939		TERT
IGFBP5_E144_F	IGFBP5	0.0918221	0.00495721	0.0276524		TESK2
TWIST1_P355_R	TWIST1	0.0910178	0.00164557	0.0119373		TFAP2C
FHIT_E19_R	FHIT	0.0818717	0.000928664	0.00734657		TFRC
CCNE1_P683_F	CCNE1	0.0818215	0.00440835	0.0251031		TGFA
C20orf47_P225_R	C20orf47	0.0780039	0.00692528	0.0346264		TGFBI
SMO_P455_R	SMO	0.0777032	0.0031372	0.0196374		THBS1
YES1_P216_F	YES1	0.0760731	0.0110475	0.0487041		THY1
BMP6_P398_F	BMP6	0.073784	0.00380178	0.0221096		TJP2
DST_E31_F	DST	0.0724851	0.00164053	0.0119373		TMEFF1
RAF1_P330_F	RAF1	0.0724129	0.00545688	0.0294243		TNC
APP_P179_R	APP	0.0716689	0.00525953	0.0289451		TNK1
MLLT3_E93_R	MLLT3	0.0689938	0.00238597	0.0154879		TSG101
SLIT2_P208_F	SLIT2	0.0657609	0.00120938	0.00942022		TWIST1
TGFA_P558_F	TGFA	0.0617091	0.00165957	0.0119373		TWIST1
FYN_P352_R	FYN	0.061405	0.00224542	0.0148488		UBA52
HLF_E192_F	HLF	0.0559707	0.0018511	0.0130854		WNT5A
RARB_E114_F	RARB	0.0485039	0.000267777	0.00296725		YES1
PTK2B_P673_R	PTK2B	0.0423734	0.00890795	0.0427165		YES1
CCKBR_P361_R	CCKBR	0.0403388	0.00196297	0.0134973		ZMYND10
RBP1	SNCG
RUNX3	SPARC
SLIT2	TFRC
SNURF	TMEFF1
TWIST1
YES1
ZIM2

## Sheet: Sheet3
	Symbol
1	AATK
2	ACVR1C
3	APBA1
4	APC
5	APP
6	ARNT
7	AXL
8	BCL6
9	BCR
10	BMP6
11	C20orf47
12	CALCA
13	CAV1
14	CCKBR
15	CCNA1
16	CCND3
17	CCNE1
18	CD44
19	CD9
20	CDK10
21	CDK6
22	CDKN2B
23	CHFR
24	COL1A1
25	COL1A2
26	CSPG2
27	CTSL
28	CYP1B1
29	DAPK1
30	DCC
31	DDB2
32	DIO3
33	DNAJC15
34	DNMT1
35	DST
36	E2F5
37	EGFR
38	EGR4
39	ELK3
40	EPHA3
41	EPHA7
42	EPHB1
43	EPHB3
44	EPS8
45	ERG
46	ESR1
47	EYA4
48	FANCG
49	FGF2
50	FHIT
51	FYN
52	FZD9
53	GABRB3
54	GNMT
55	HHIP
56	HIF1A
57	HLF
58	HOXA9
59	HOXB13
60	HS3ST2
61	HTR1B
62	ID1
63	IFNGR2
64	IGF2AS
65	IGFBP5
66	IRF5
67	ITGA2
68	ITGA6
69	LYN
70	MAP3K1
71	MDS1
72	MLF1
73	MLH3
74	MLLT3
75	MME
76	MMP14
77	MMP2
78	MT1A
79	MYOD1
80	NGFR
81	NQO1
82	NRAS
83	NTRK2
84	NTRK3
85	PDE1B
86	PRKCDBP
87	PRSS8
88	PSIP1
89	PTCH2
90	PTGS1
91	PTGS2
92	PTK2B
93	PTPRG
94	RAF1
95	RARB
96	RARRES1
97	RBP1
98	RHOC
99	ROR1
100	RUNX3
101	RYK
102	SEPT5
103	SEPT9
104	SERPINE1
105	SLIT2
106	SMARCB1
107	SMO
108	SNCG
109	SOX17
110	SOX2
111	TCF7L2
112	TERT
113	TESK2
114	TFAP2C
115	TFRC
116	TGFA
117	TGFBI
118	THBS1
119	THY1
120	TJP2
121	TMEFF1
122	TNC
123	TNK1
124	TSG101
125	TWIST1
126	UBA52
127	WNT5A
128	YES1
129	ZMYND10
